# Supplementary material for: Heat and solvent responsive polytriazole: shape recovery properties in different solvents
Source: Royal Society of Chemistry journal article supplement (doi:10.1039/c6ra11776g), 2016-01-01
Supplement: c6ra11776g1.pdf [file c6ra11776g1.pdf]

## Supporting Information

**SI 1** Synthesis and characterization of monomers .

**SI 2** Calculation of recovery strength of heat actuated TAPF polymer as a function of temperature.

**SI 3 a)** Calculation of cross-link density **b)** Thermo gravimetric analysis of TAPF.

**SI 4** Molecular level properties of type I and type II solvents

**SI5** Plots of  $\log Q_t/Q_E$  vs.  $\log t$  of TAPF in type I and type II solvents

**SI 6** Calculation of surface energy of TAPF polymer.

**SI 7** Surface tension of various solvents used in this study.

**SI 8** DMA of TAPF sample after shape recovery from methanol and ethanol. A reduction in storage modulus was noticed but still above 1.5 GPa.

## SI 1 Synthesis and characterization of monomers

Tris (4-glycidyloxy phenyl) methane (50 mmol), sodium azide (250 mmol), ammonium chloride (250 mmol) were magnetically stirred for half an hour at ambient condition in dimethylformamide (80ml) in a 250ml round bottom flask. The temperature was increased to 60°C and reaction continued for about 40 h. The resinous product was separated by pouring the mixture into distilled water and by subsequent decantation. The product was extracted with diethyl ether and washed several times with water. The solvent was stripped-off from the product by rota-vapour. The product which obtained as a yellow-orange viscous liquid was finally dried under vacuum at 60° C for 24 hrs. The monomer (TA) was characterized by FTIR, NMR and for epoxy content. FTIR (KBr,  $\text{cm}^{-1}$ ): 2105 and 3384;  $^1\text{H}$  NMR (ppm,  $\text{CDCl}_3$ ): 4.2, 3.7, 3.2; Epoxy content  $_{\text{initial}} = 6.3$  mequiv/g and epoxy content  $_{\text{after reaction}} = <0.1$  mequiv/g. The second monomer PF was synthesized as per our previous report (46). The characteristic peaks due to C-H and alkynic stretching were observed at  $3274 \text{ cm}^{-1}$  and  $2125 \text{ cm}^{-1}$  respectively in the FTIR spectrum of propargyl monomer.  $^1\text{H}$  NMR (ppm,  $\text{CDCl}_3$ ): 6.827.12(m), 4.69(s) 2.91(s). Hydroxyl content for propargyl monomer is 0 mg KOH/g.

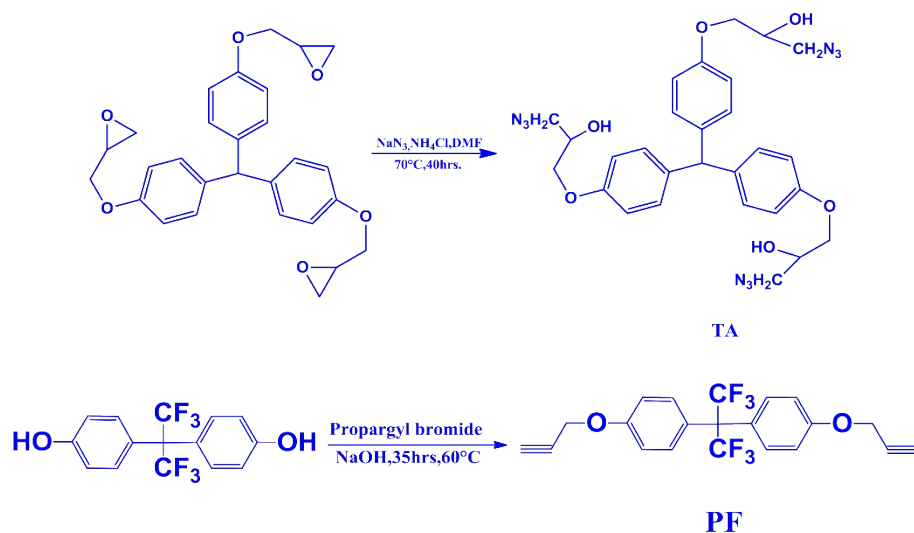

Schematic representation of azidation and propargylation

(SI 1a)

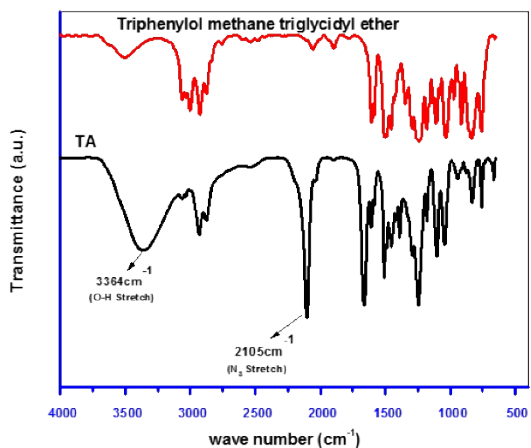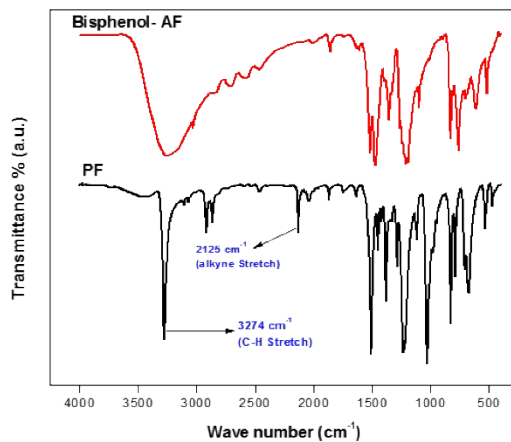

FTIR of a) tris azide (TA) and its parent compound triphenylol methane triglycidyl ether b) propargyl bisphenol AF (PF) and its parent compound bisphenol AF

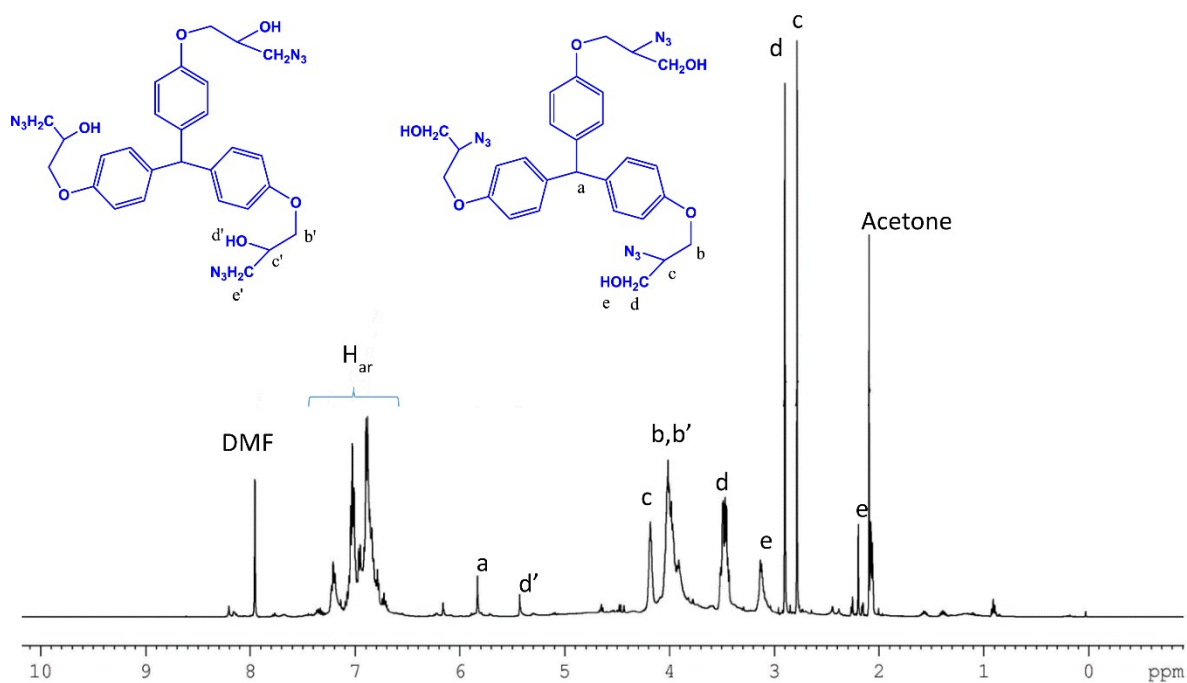

<sup>1</sup>H NMR of [tris (4-(1-azido 3-oxo propan-2-ol) phenyl) methane] (TA)

(SI 1 b)

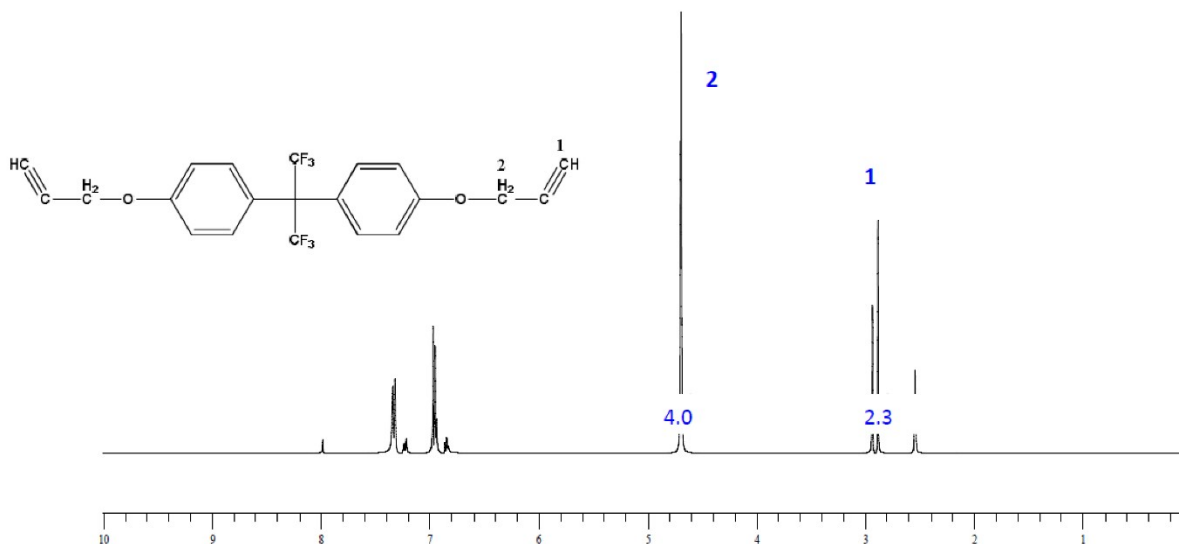

<sup>1</sup>H NMR of [4,4'-(perfluoropropane-2,2-diyl)bis(prop-2-yn-1-yloxy)benzene (PF)]

(SI 1 c)

**SI 2 Calculation of recovery strength of heat actuated TAPF polymer as a function of temperature**

$$\text{Recovery strength} = (G_m^2 + L_m^2)^{1/2}$$

$G_m$  = Storage modulus at each temperature

$L_m$  = Loss modulus at each temperature

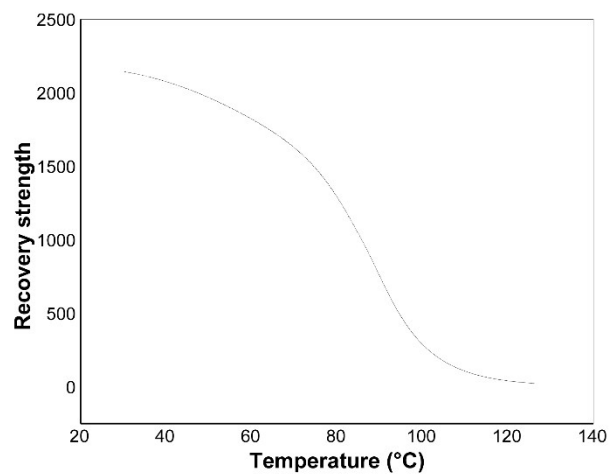

### SI 3a Calculation of cross-link density

According to theory of rubber elasticity, cross-link density of moderately cross-linked polymers can be calculated using the equation

$$\begin{aligned} X_{\text{density}} &= G/RT \\ &= 23 / 84 \times 10^{-6} \\ &= \underline{6.8 \times 10^3 \text{ moles/m}^3} \end{aligned}$$

$X_{\text{density}}$  = Cross-link density in moles/m<sup>3</sup>  
G = Rubbery modulus (at T<sub>trigger</sub>+20°C)  
R= Universal gas constant (8.314 cm<sup>3</sup> MPa K<sup>-1</sup> mol<sup>-1</sup>)  
T= (T<sub>trigger</sub> +20 °C) in Kelvin scale

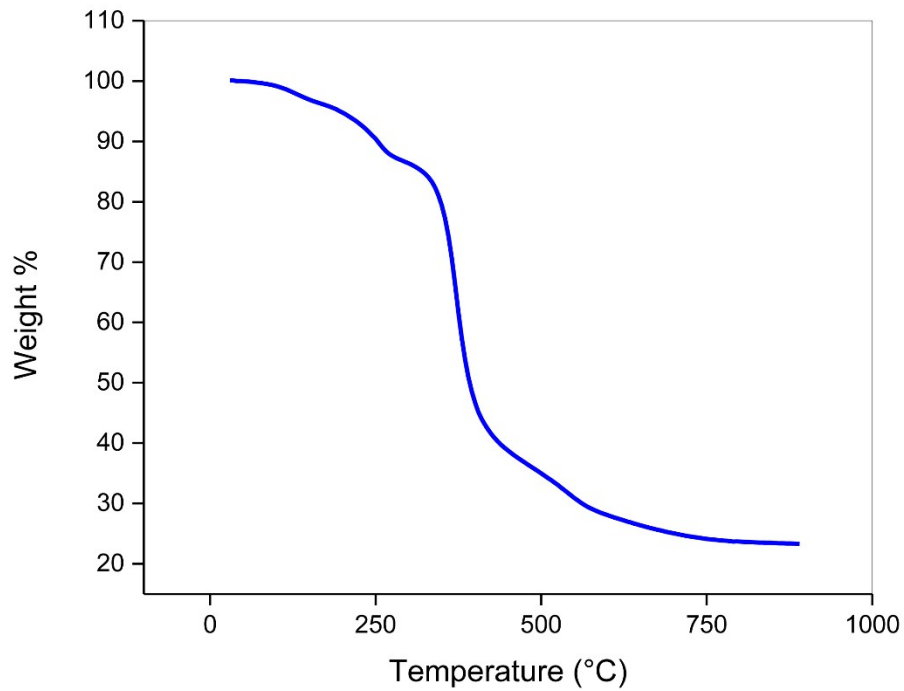

SI 3b Thermogravimetric analysis of TAPF

#### SI 4 Molecular level properties of type I and type II solvents

|         | Solvents | $\Delta$<br>(Cal/cm <sup>3</sup> ) <sup>1/2</sup> | $\delta_p$<br>(mJ/m <sup>3</sup> ) | $\delta_H$<br>(mJ/m <sup>3</sup> ) | $\delta_d$<br>(mJ/m <sup>3</sup> ) |
|---------|----------|---------------------------------------------------|------------------------------------|------------------------------------|------------------------------------|
| Type I  | DMF      | 12.1                                              | 13.7                               | 11.2                               | 17.4                               |
|         | Acetone  | 9.8                                               | 10.4                               | 6.9                                | 15.5                               |
|         | DCM      | 9.9                                               | 6.3                                | 7.8                                | 18.2                               |
|         | MEK      | 9.3                                               | 9.0                                | 5.1                                | 15.9                               |
| Type II | EtOH     | 12.9                                              | 8.8                                | 19.4                               | 15.8                               |
|         | MeOH     | 14.3                                              | 12.3                               | 22.3                               | 14.7                               |
|         | n-BuOH   | 23.2                                              | 5.7                                | 15.8                               | 16.0                               |
| Water   |          | 23.5                                              | 16.0                               | 42.3                               | 15.5                               |

$\Delta$ - Hansen solubility parameter,  $\delta_p$  - polarity factor,  $\delta_H$  - hydrogen bonding factor,  $\delta_d$  - dispersive factor,

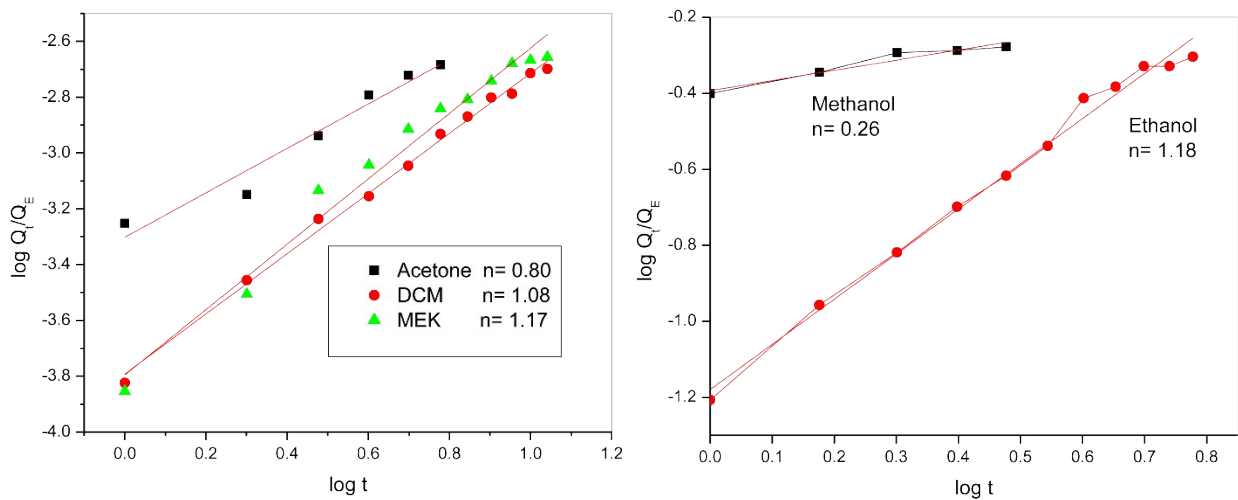

#### SI 5 Plots of $\log Q_t/Q_E$ vs. $\log t$ of TAPF in type I and type II solvents

## SI 6 Calculation of surface energy of TAPF polymer

Method: Owens, Wendt, Rabel and Kaelble (OWRK) Method

| Liquid          | Contact angle (°) | Surface energy (mN/m) | Dispersive force (mN/m) | Polar force (mN/m) |
|-----------------|-------------------|-----------------------|-------------------------|--------------------|
| Water           | 80                | 40.9                  | 36.8                    | 4.1                |
| Diiodomethane   | 40                |                       |                         |                    |
| Ethylene glycol | 57                |                       |                         |                    |

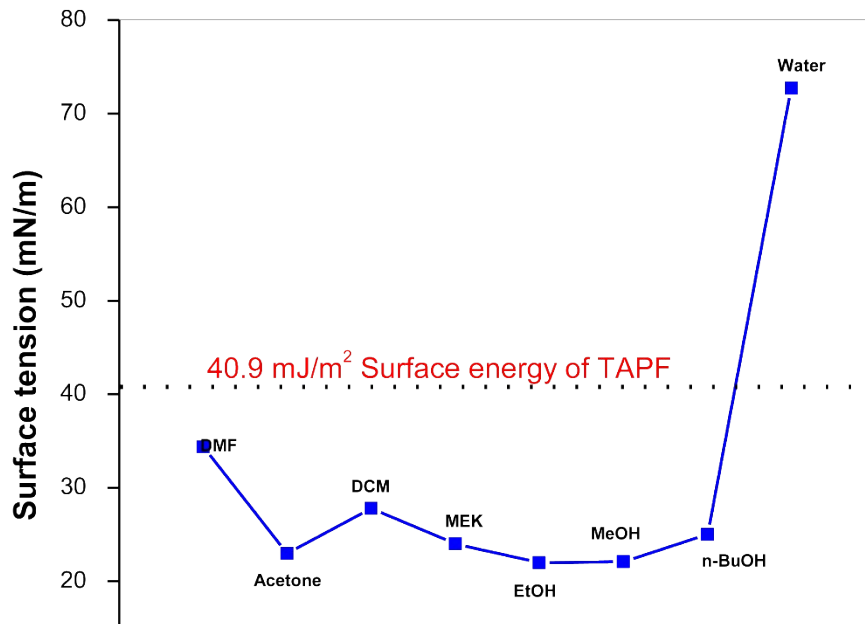

SI 7 Surface tension of various solvents used in this study.

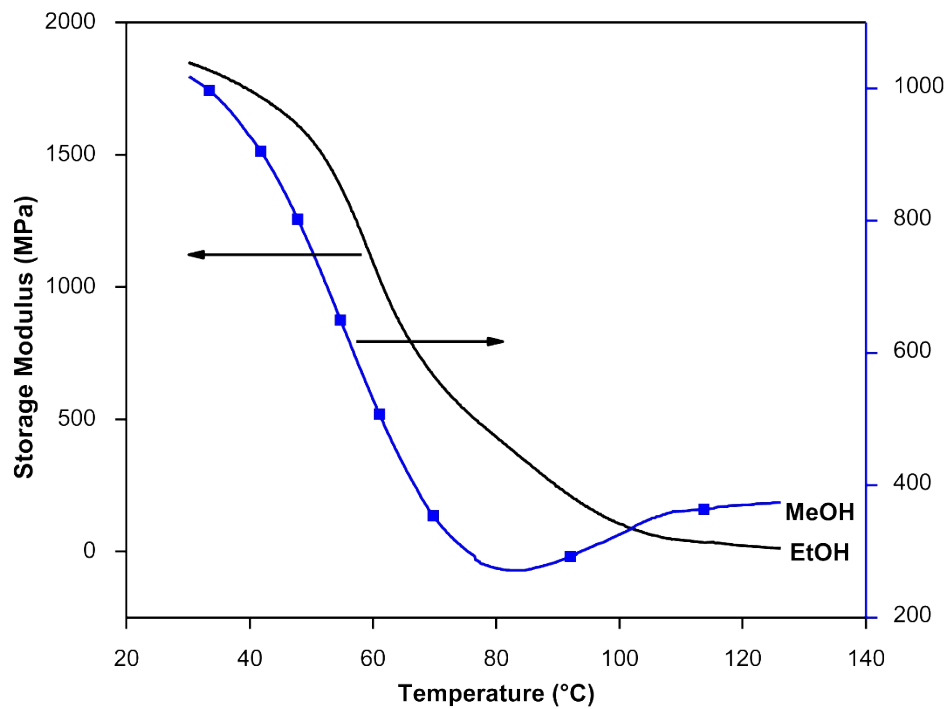

**SI 8 DMA of TAPF sample after shape recovery from methanol and ethanol. A reduction in storage modulus was noticed but still above 1.5 GPa.**
